# Supplementary material for: Operational and Probabilistic Evaluation of AQMEII-4 Regional Scale Ozone Dry Deposition. Time to Harmonise Our LULC Masks
Source: Copernicus journal article supplement (doi:10.5194/egusphere-2025-1091), 2025-03-19
Supplement: Supplementary file 1 [file egusphere-2025-1091-supplement.pdf]

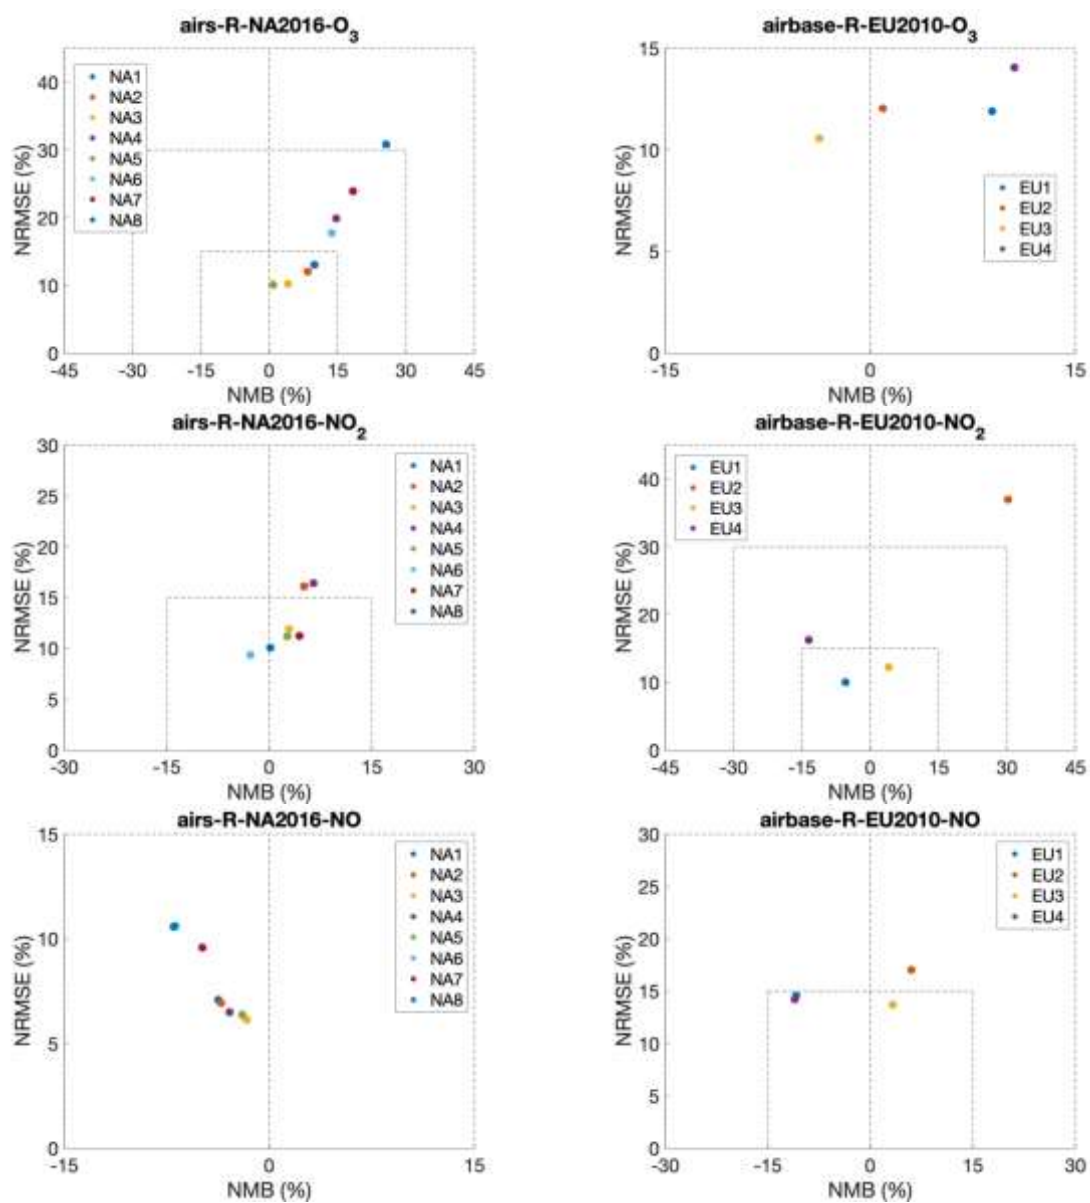

**Figure S1:** Soccer plot diagrams of  $NO$ ,  $NO_2$  and  $O_3$ . Left panels NA case, right panels EU case.

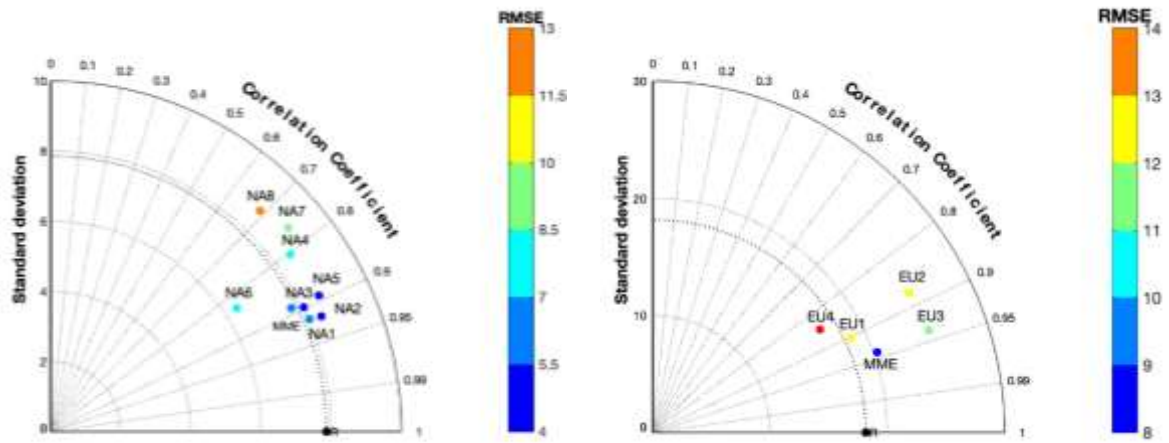

**Figure S2:** Taylor diagrams of Ozone simulation for 2016 in NA (left) and EU2010 (right).

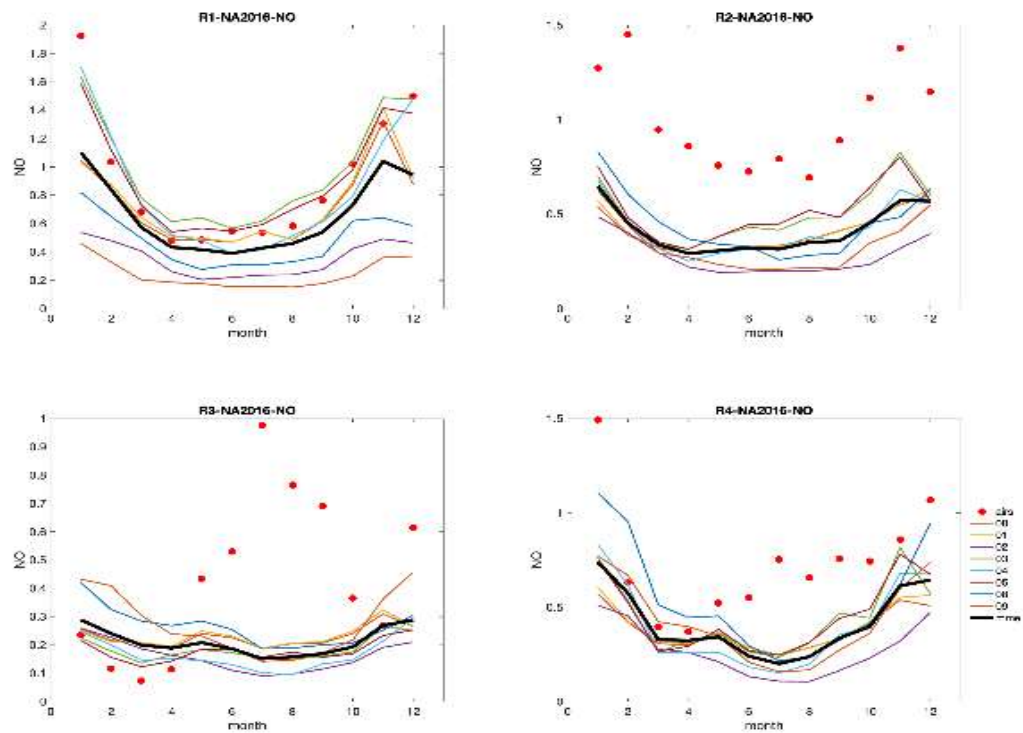

**Figure S3:** Subregional analysis of NO and NO<sub>2</sub> for the NA case

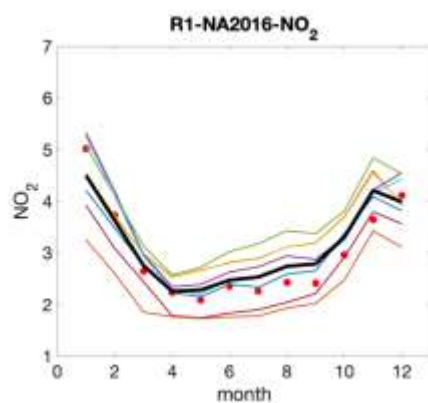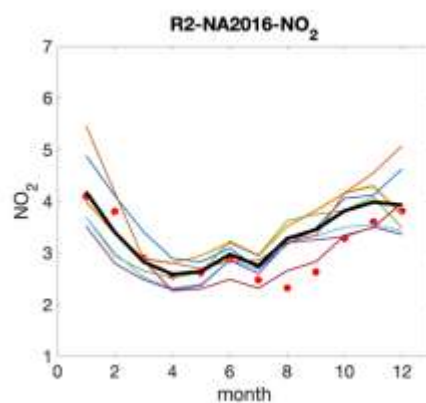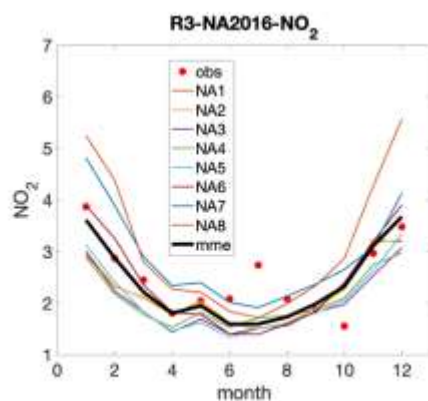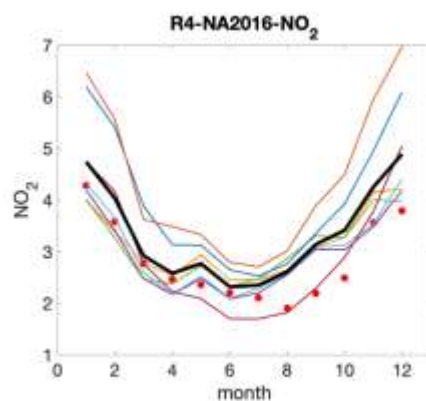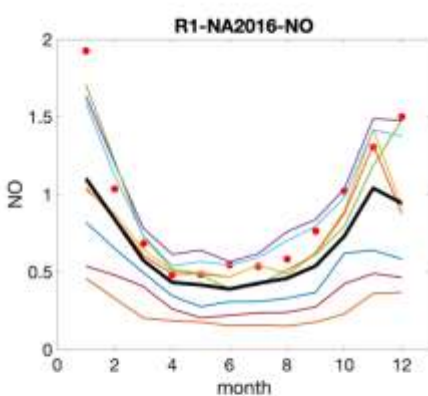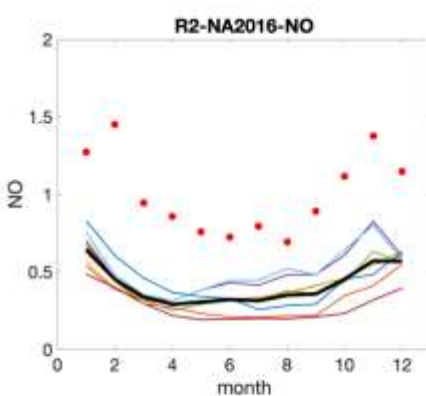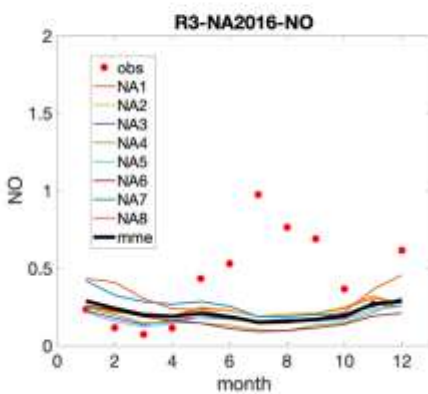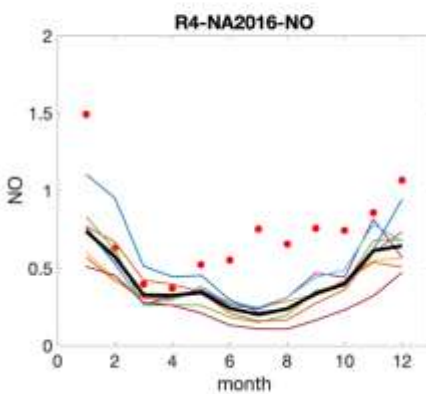

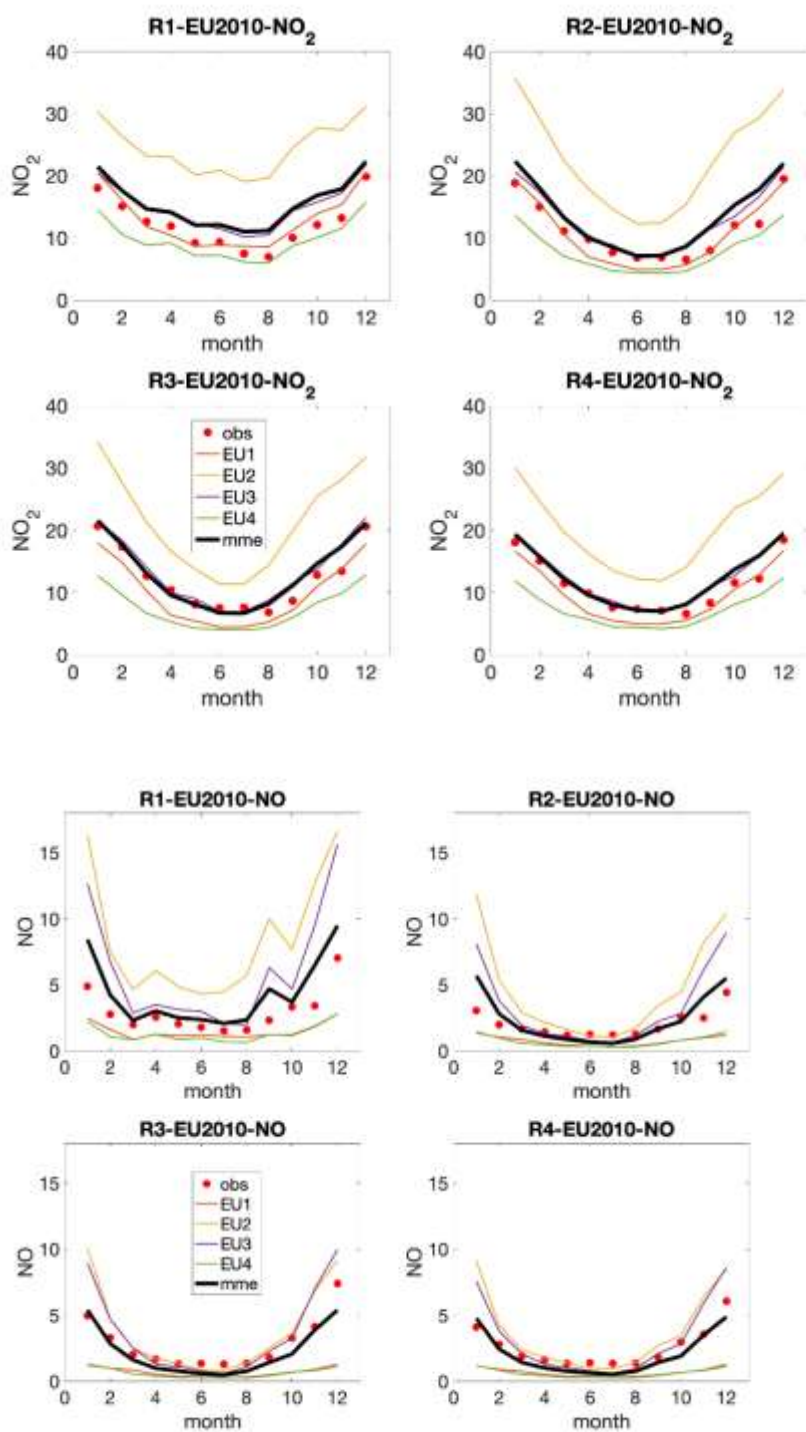

**Figure S4:** Subregional analysis of NO and NO<sub>2</sub> for the EU case

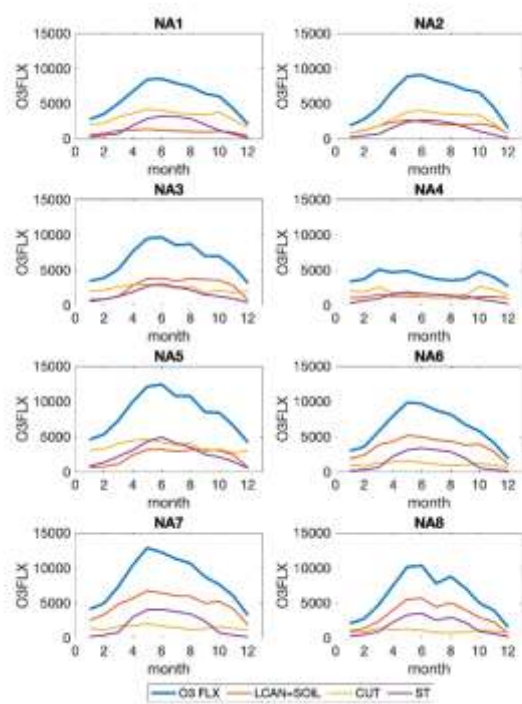

(a)

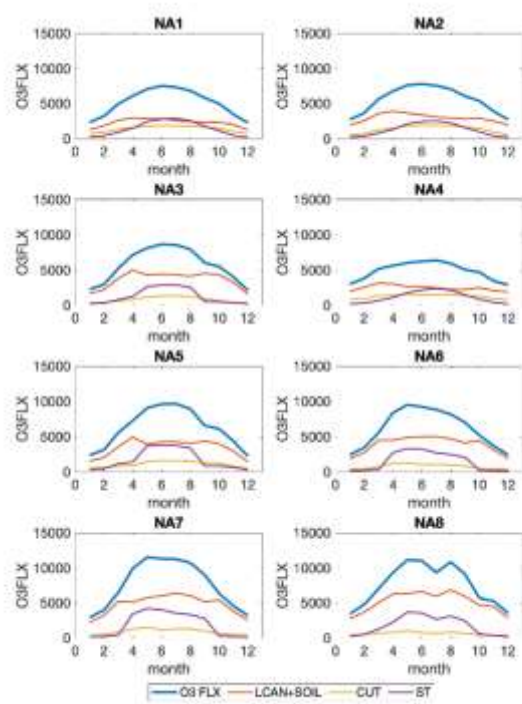

(b)

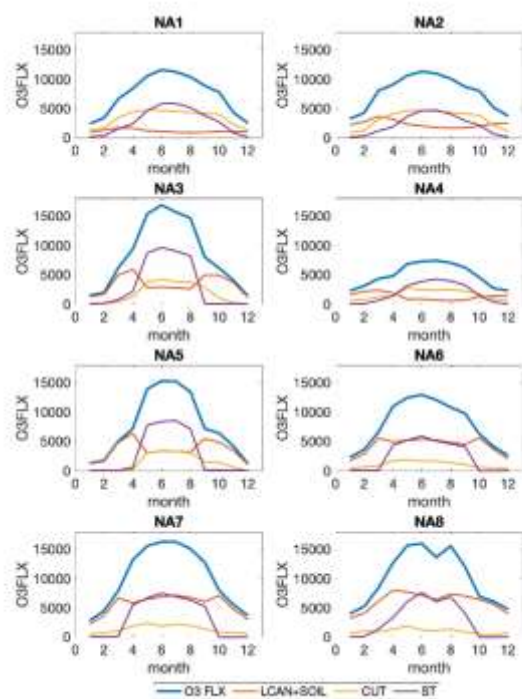

(c)

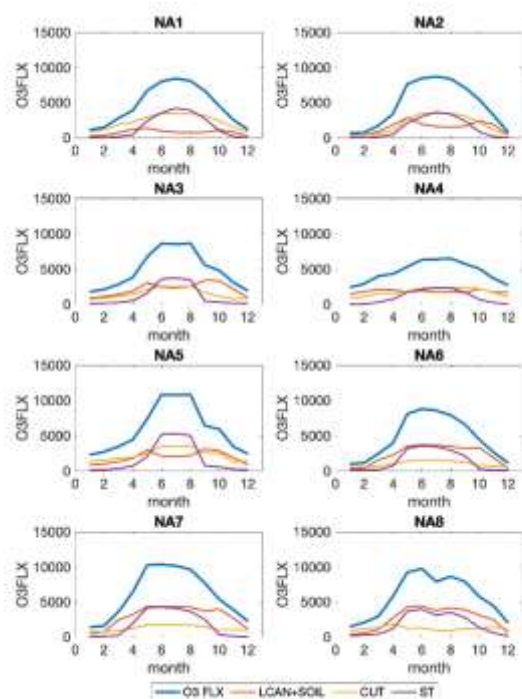

(d)

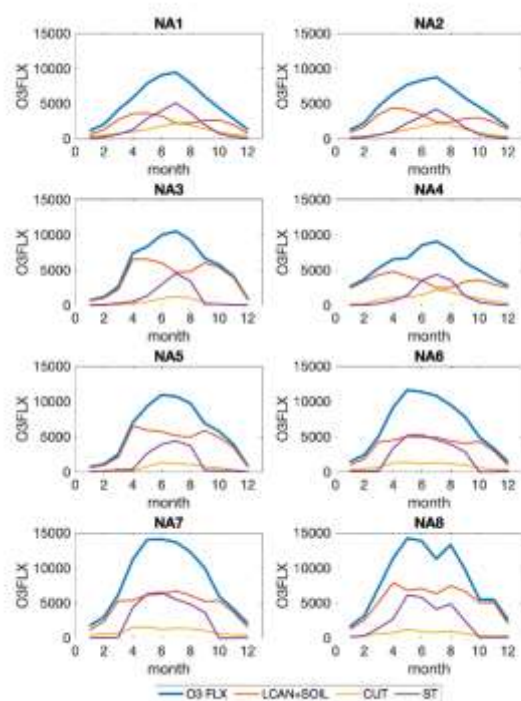

(e)

**Figure S5** NA case study: Ozone dry deposition flux (O3FLX), lower canopy and soil effective fluxes combined in one factor (LCAN+SOIL), Cuticular effective flux (CUT) and Stomatal effective flux (ST) for shared grid cells covered by at least 85% of (a) needle-leaf forest, (b) O3 Receptors, (c) Deciduous Broadleaf Forest, (d) Mixed Forest, (e) Planted-Cultivated.



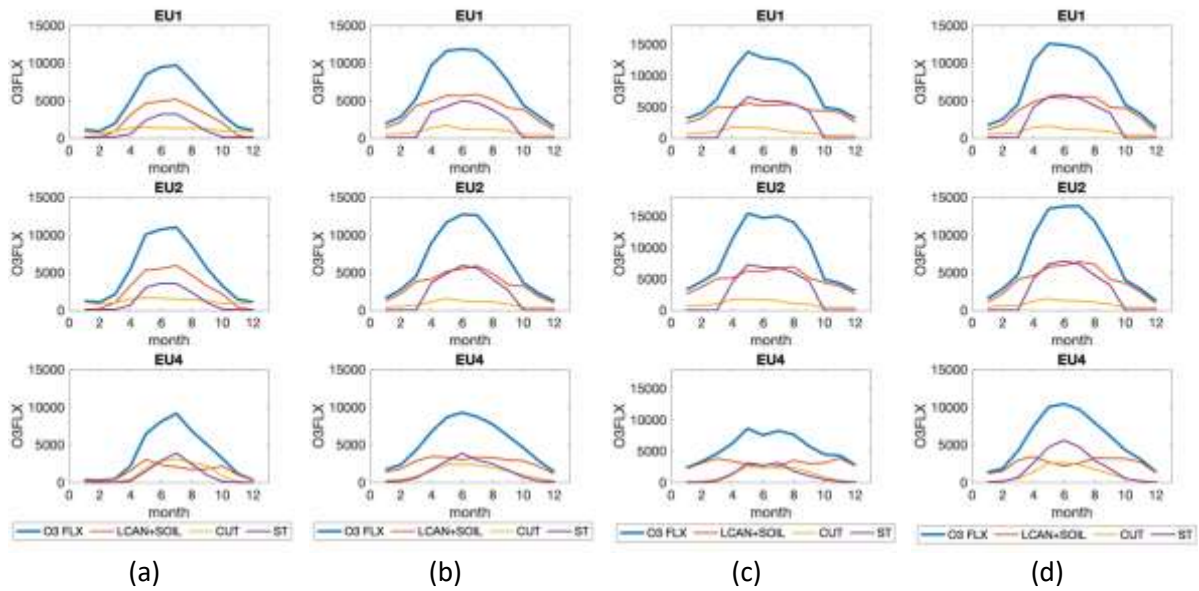

**Figure S6** EU case study: Ozone dry deposition flux (O3FLX), lower canopy and soil effective fluxes combined in one factor (LCAN+SOIL), Cuticular effective flux (CUT) and Stomatal effective flux (ST) for shared grid cells covered by at least 85% of (a) needle-leaf forest, (b) O3 Receptors, (c) Deciduous Broadleaf Forest, (d) Planted-Cultivated.

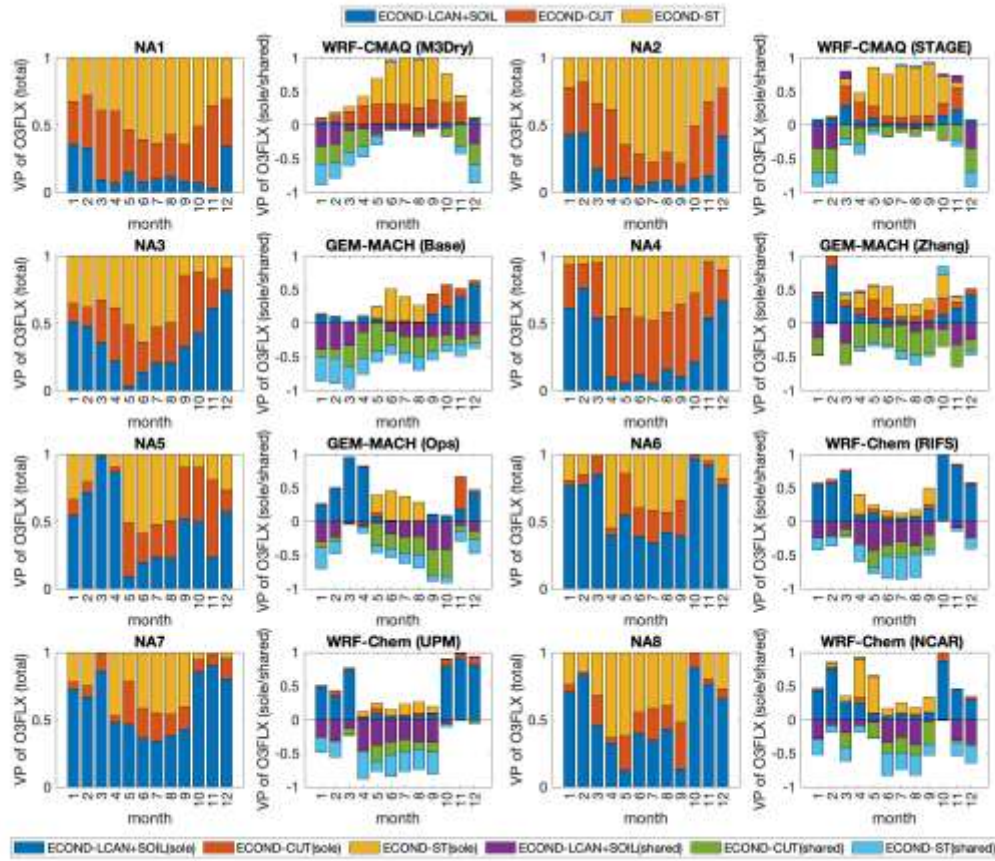

**Figure S7:** NA case study at 581 shared cells covered by at least 85% of Deciduous Broadleaf Forest. Panels in 1<sup>st</sup> and 3<sup>rd</sup> column: Variance Partition (VP) of ozone dry deposition flux into the individual importance (i.e. total effect) of (1) lower canopy and soil effective fluxes combined in one factor, (2) Cuticular effective flux and (3) Stomatal effective flux. Panels in 2<sup>nd</sup> and 4<sup>th</sup> column: Split of the individual importance of the effective fluxes into sole and shared contributions. The shared effects are displayed with negative numbers. For the sake of making the pictures easier to read, the explicit regional model and deposition module used are reported in the figure.



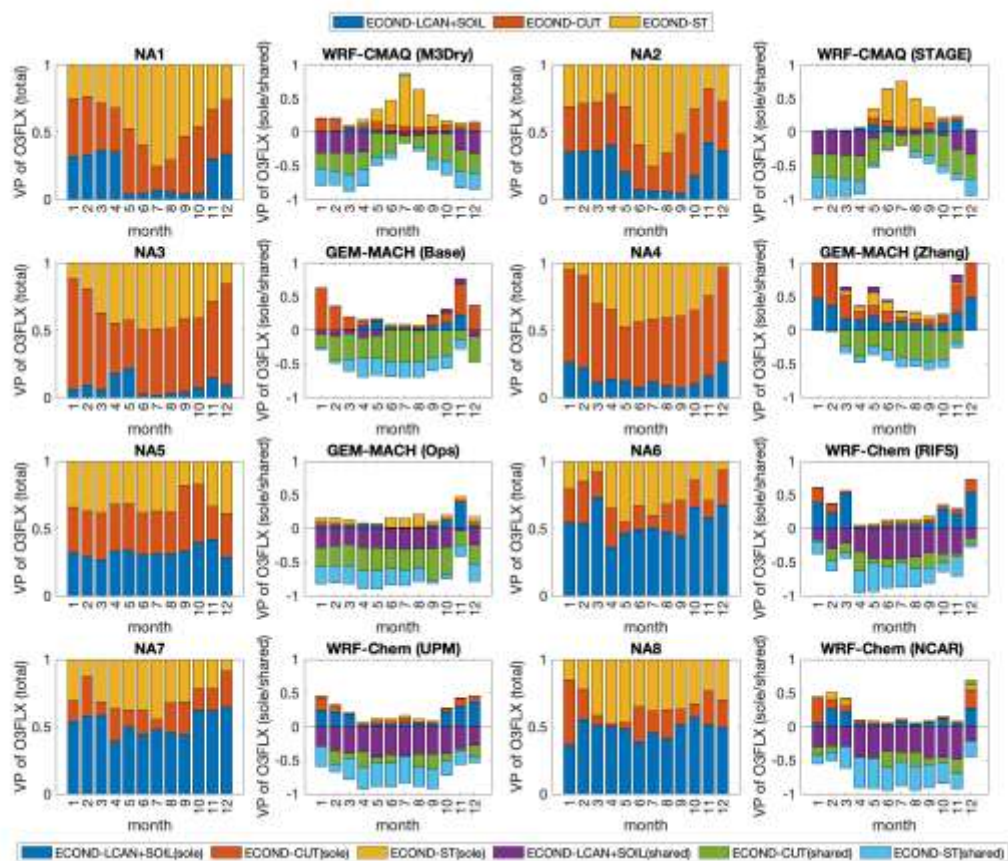

**Figure S8:** Same as S5 for Mixed Forest land use (705 shared cells)

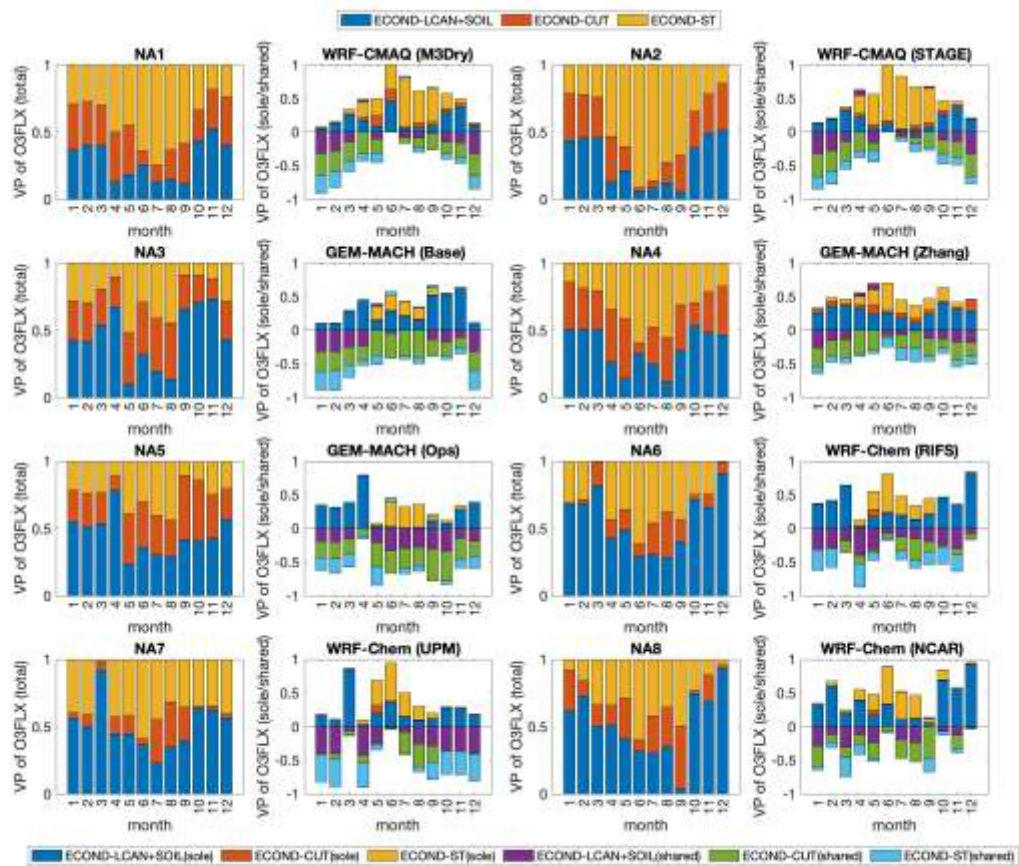

**Figure S9:** Same as S5 for Planted-Cultivated land use (6130 shared cells)

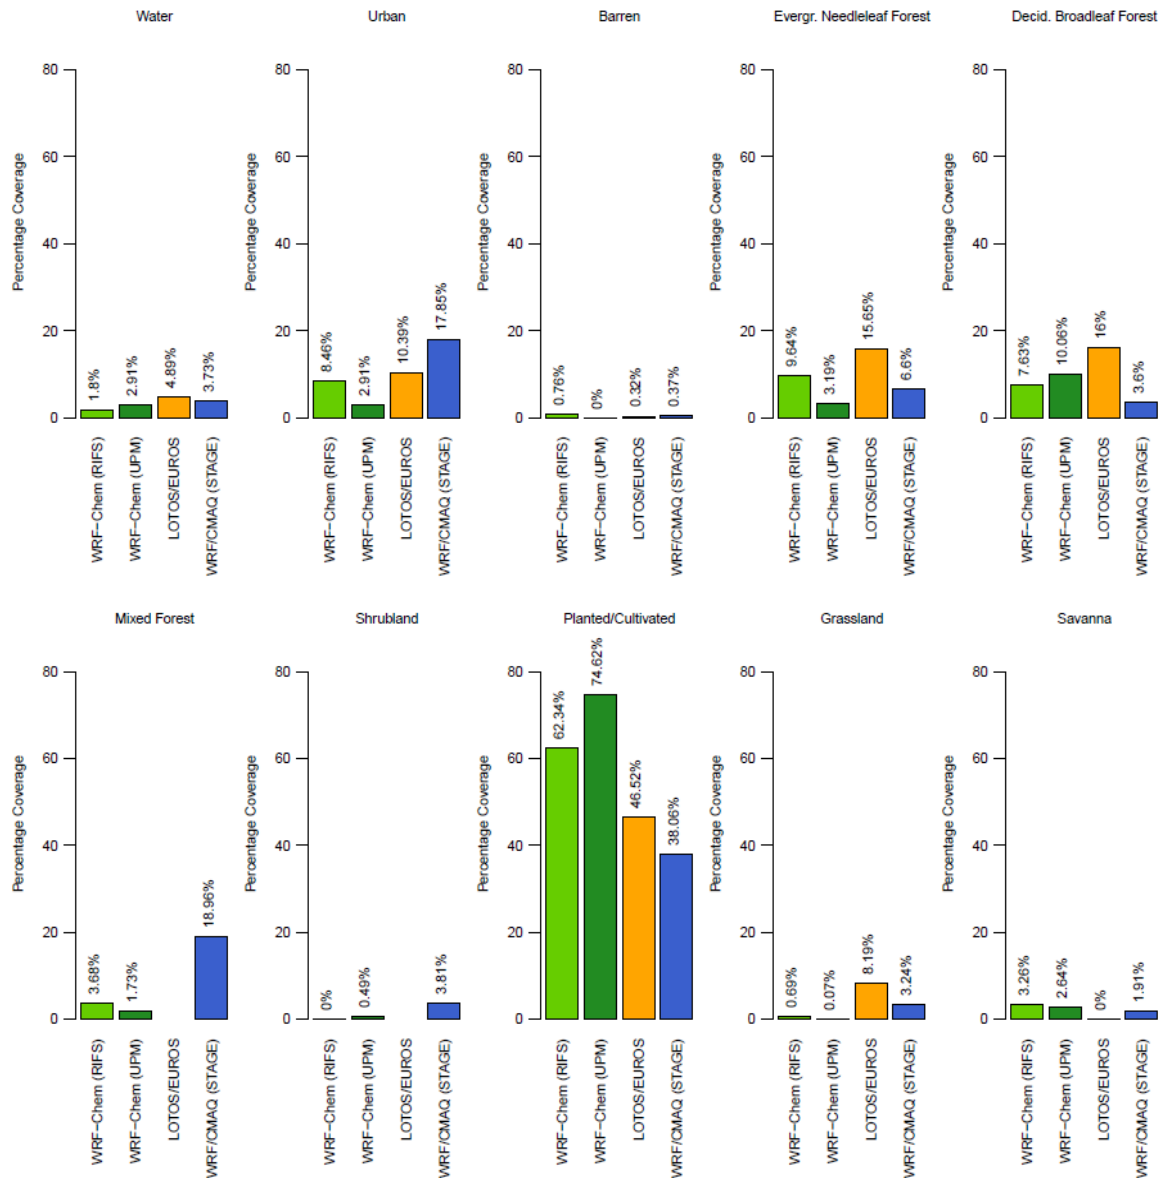

**Figure S10** (top) Fraction of entire EU common domain (excl. grid cells dominated by water, i.e. water fraction > 0.5) covered by each LU type. (bottom) Fraction of all grid cells corresponding to O3 receptor locations covered by each LU type
